# Supplementary material for: Phytoplankton nutrient dynamics and flow cytometry based population study of a eutrophic wetland habitat in eastern India, a Ramsar site
Source: Royal Society of Chemistry journal article supplement (doi:10.1039/c7ra12761h), 2018-01-01
Supplement: c7ra12761h1.pdf [file c7ra12761h1.pdf]

**Supplementary figures:**

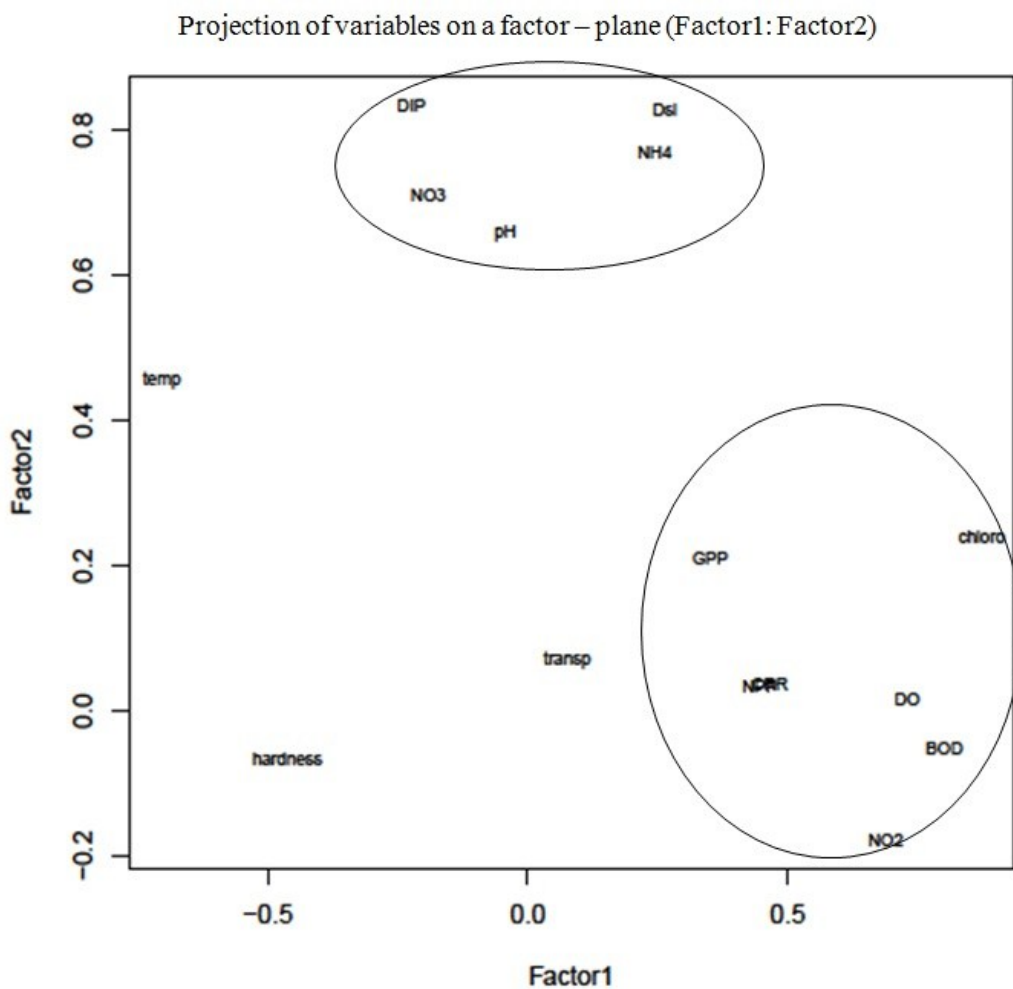

**Supplementary figure 1:** Factor analysis (FA) plot of factor 1 vs. factor 2 for environmental variables recorded from the study area during the entire study period

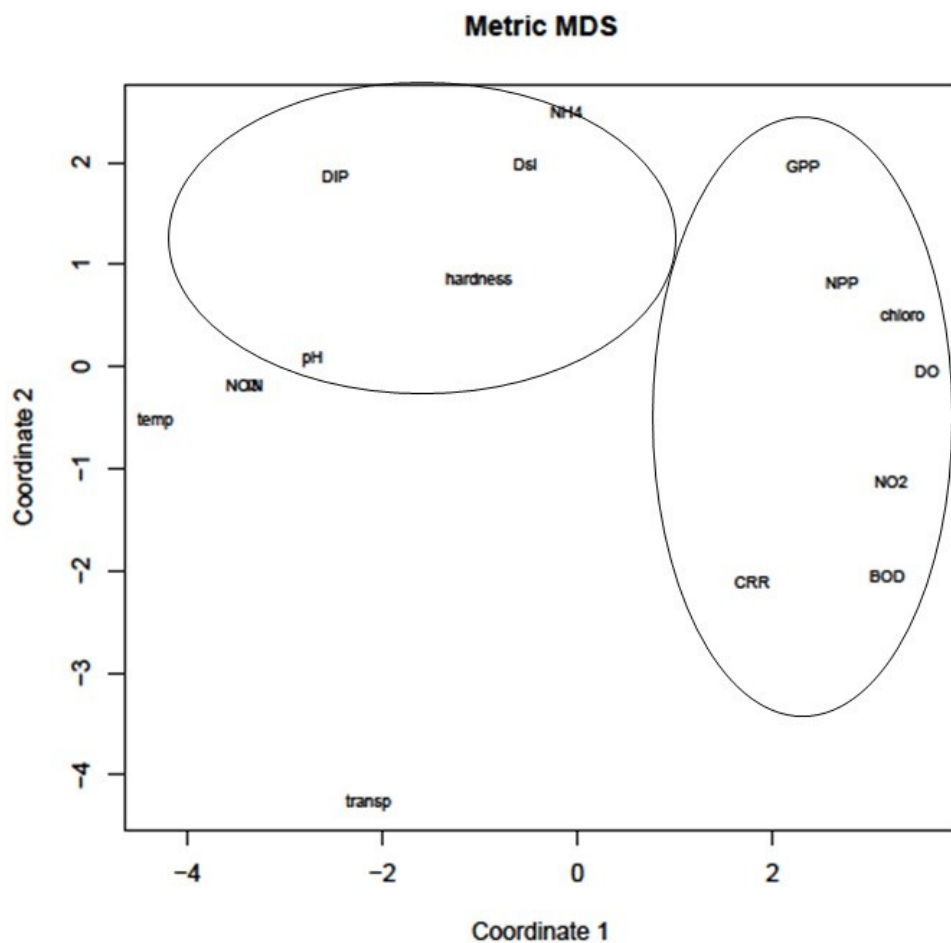

**Supplementary figure 2:** Metric multidimensional scaling (MDS) plot of Coordinate 1 vs. Coordinate 2 for environmental variables recorded from the study area during the entire study period
